# Supplementary material for: Identification of immune-related hub genes and miRNA-mRNA pairs involved in immune infiltration in human septic cardiomyopathy by bioinformatics analysis
Source: Front Cardiovasc Med. 2022 Sep 20;9:971543. doi: 10.3389/fcvm.2022.971543 (PMC9530044; doi:10.3389/fcvm.2022.971543)
Supplement: Supplementary file 2 [file Table_2.XLSX]

## Sheet: Cluster 1
GO	Category	Description	Count	%	Log10(P)	Log10(q)
hsa00190	KEGG Pathway	Oxidative phosphorylation	36	94.74	-84.1	-79.75
GO:0006119	GO Biological Processes	oxidative phosphorylation	35	92.11	-82.49	-78.44
GO:0015986	GO Biological Processes	proton motive force-driven ATP synthesis	26	68.42	-60.81	-57.92
GO:0005740	GO Cellular Components	mitochondrial envelope	38	100	-60.55	-57.68
GO:0070069	GO Cellular Components	cytochrome complex	10	26.32	-20.41	-17.98
GO:1902600	GO Biological Processes	proton transmembrane transport	11	28.95	-17.41	-14.99
GO:0006122	GO Biological Processes	mitochondrial electron transport, ubiquinol to cytochrome c	6	15.79	-14.11	-11.7
GO:0051536	GO Molecular Functions	iron-sulfur cluster binding	7	18.42	-11.64	-9.25
GO:0005759	GO Cellular Components	mitochondrial matrix	10	26.32	-9.5	-7.15
GO:0048038	GO Molecular Functions	quinone binding	4	10.53	-8.3	-5.97
GO:0005758	GO Cellular Components	mitochondrial intermembrane space	4	10.53	-5.44	-3.17
GO:0072593	GO Biological Processes	reactive oxygen species metabolic process	3	7.89	-3.59	-1.34
GO:0020037	GO Molecular Functions	heme binding	3	7.89	-3.15	-0.9
GO:0051604	GO Biological Processes	protein maturation	3	7.89	-2.38	-0.15

## Sheet: Cluster 2
GO	Category	Description	Count	%	Log10(P)	Log10(q)
GO:0042254	GO Biological Processes	ribosome biogenesis	17	32.69	-21.19	-16.84
hsa04066	KEGG Pathway	HIF-1 signaling pathway	9	17.31	-12.62	-9.11
GO:2001233	GO Biological Processes	regulation of apoptotic signaling pathway	12	23.08	-11.9	-8.45
hsa05205	KEGG Pathway	Proteoglycans in cancer	10	19.23	-11.69	-8.29
hsa05200	KEGG Pathway	Pathways in cancer	11	21.15	-8.85	-5.88
GO:0030515	GO Molecular Functions	snoRNA binding	5	9.62	-8.62	-5.68
GO:0045239	GO Cellular Components	tricarboxylic acid cycle enzyme complex	4	7.69	-7.85	-5
GO:1903034	GO Biological Processes	regulation of response to wounding	7	13.46	-7.77	-4.95
GO:0001503	GO Biological Processes	ossification	8	15.38	-7.67	-4.88
GO:0032102	GO Biological Processes	negative regulation of response to external stimulus	9	17.31	-7.34	-4.61
hsa04510	KEGG Pathway	Focal adhesion	7	13.46	-7.27	-4.55
GO:0008285	GO Biological Processes	negative regulation of cell population proliferation	11	21.15	-7.1	-4.43
GO:0034764	GO Biological Processes	positive regulation of transmembrane transport	7	13.46	-6.89	-4.29
hsa05418	KEGG Pathway	Fluid shear stress and atherosclerosis	6	11.54	-6.84	-4.25
hsa04218	KEGG Pathway	Cellular senescence	6	11.54	-6.54	-4.04
GO:0051091	GO Biological Processes	positive regulation of DNA-binding transcription factor activity	7	13.46	-6.45	-3.96
hsa05219	KEGG Pathway	Bladder cancer	4	7.69	-6.12	-3.74
GO:0070141	GO Biological Processes	response to UV-A	3	5.77	-5.76	-3.46
GO:0071407	GO Biological Processes	cellular response to organic cyclic compound	8	15.38	-5.64	-3.37
GO:0043470	GO Biological Processes	regulation of carbohydrate catabolic process	4	7.69	-5.54	-3.31
